# Supplementary material
Source: PubMed Central journal article supplement (PMC2293123)

## Supplementary Figure 1

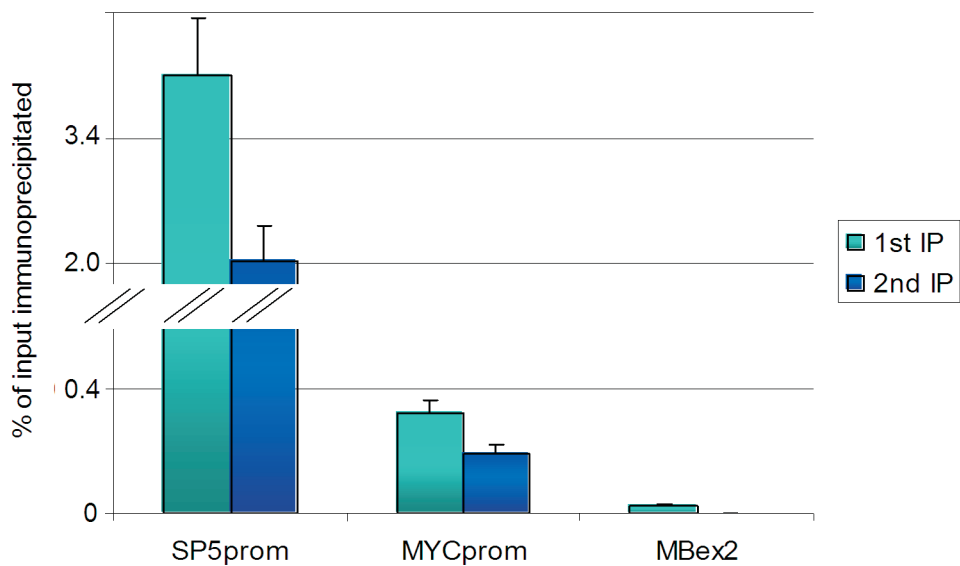

## Supplementary Figure 2

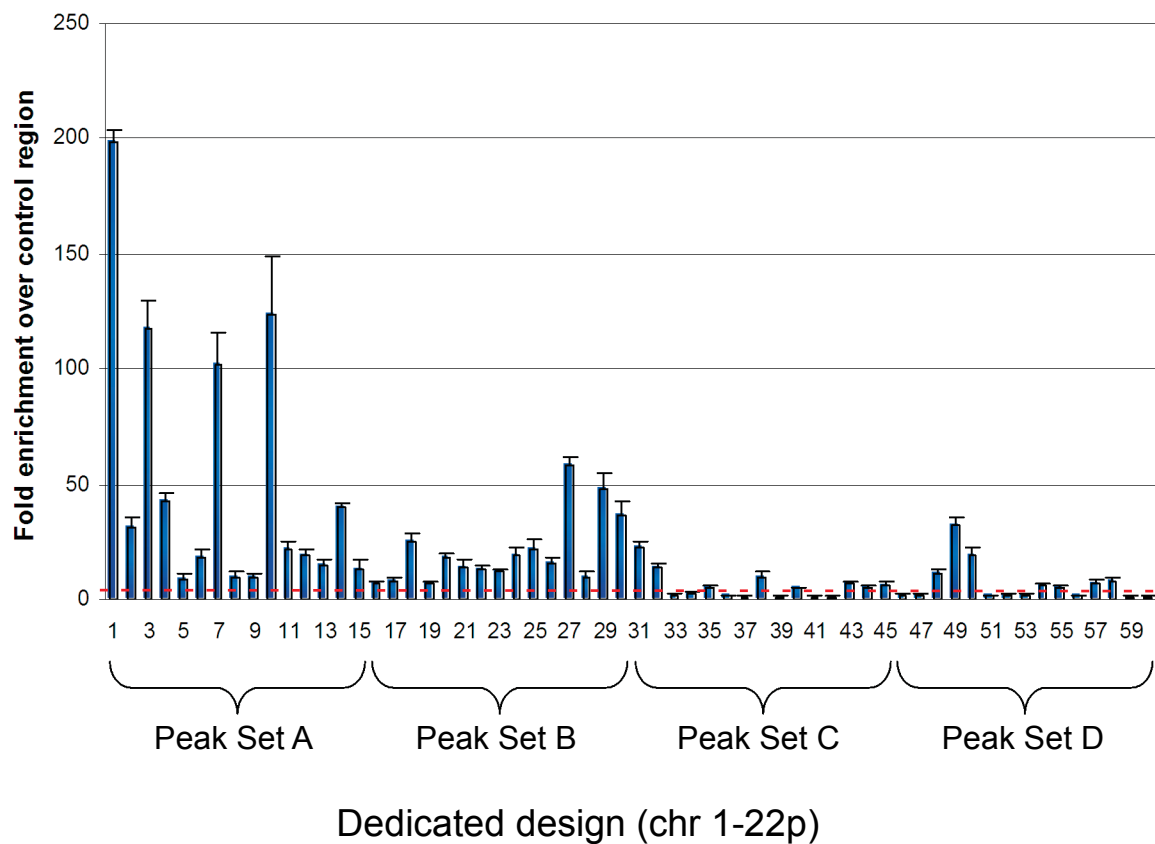

## Supplementary Figure 3

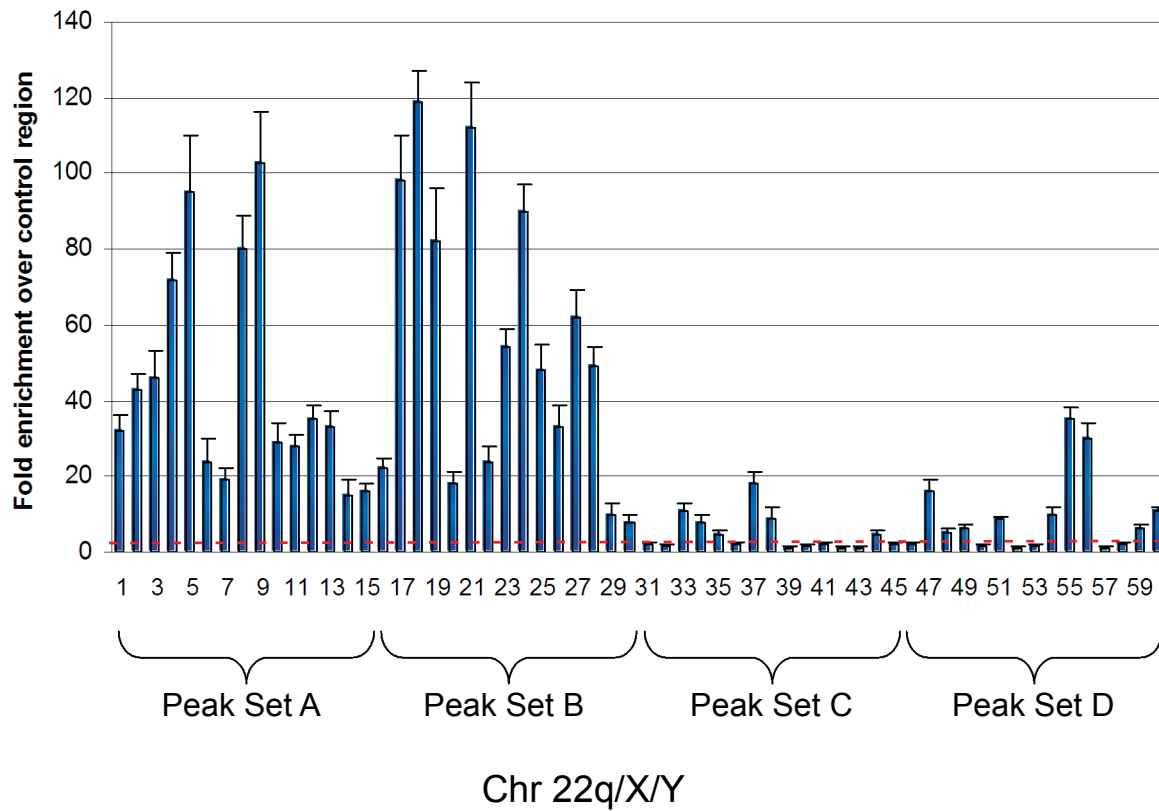

## Supplementary Figure 4

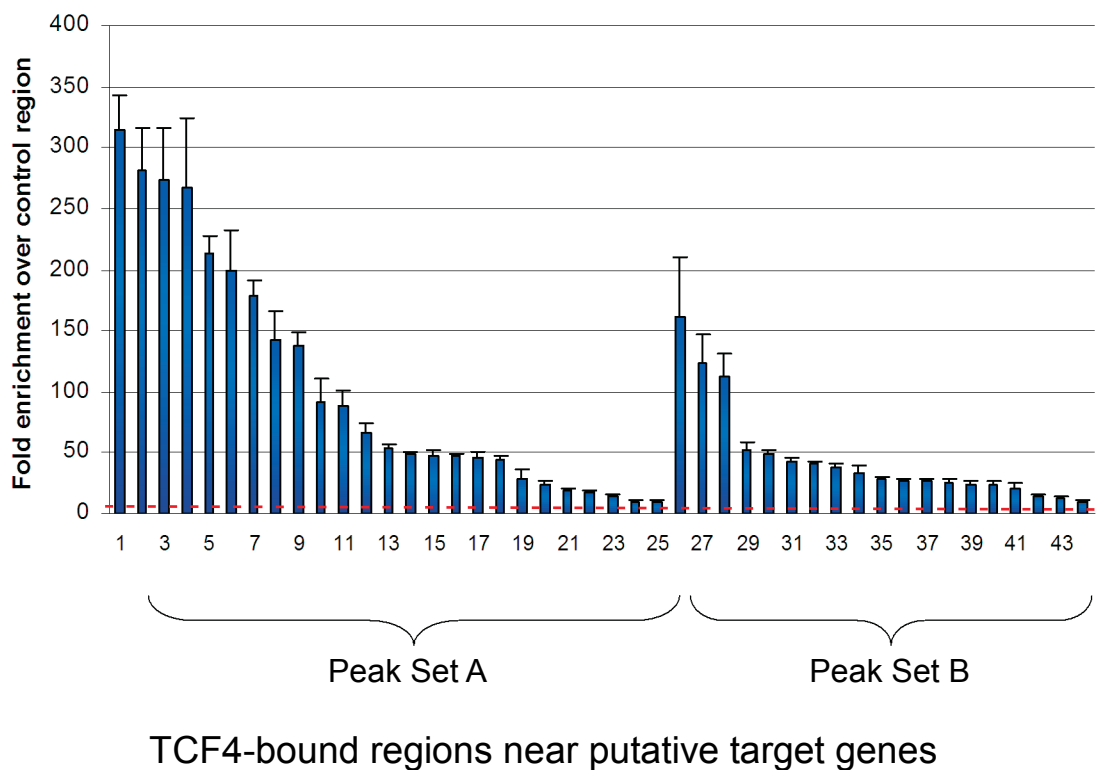

# Supplementary Figure 5

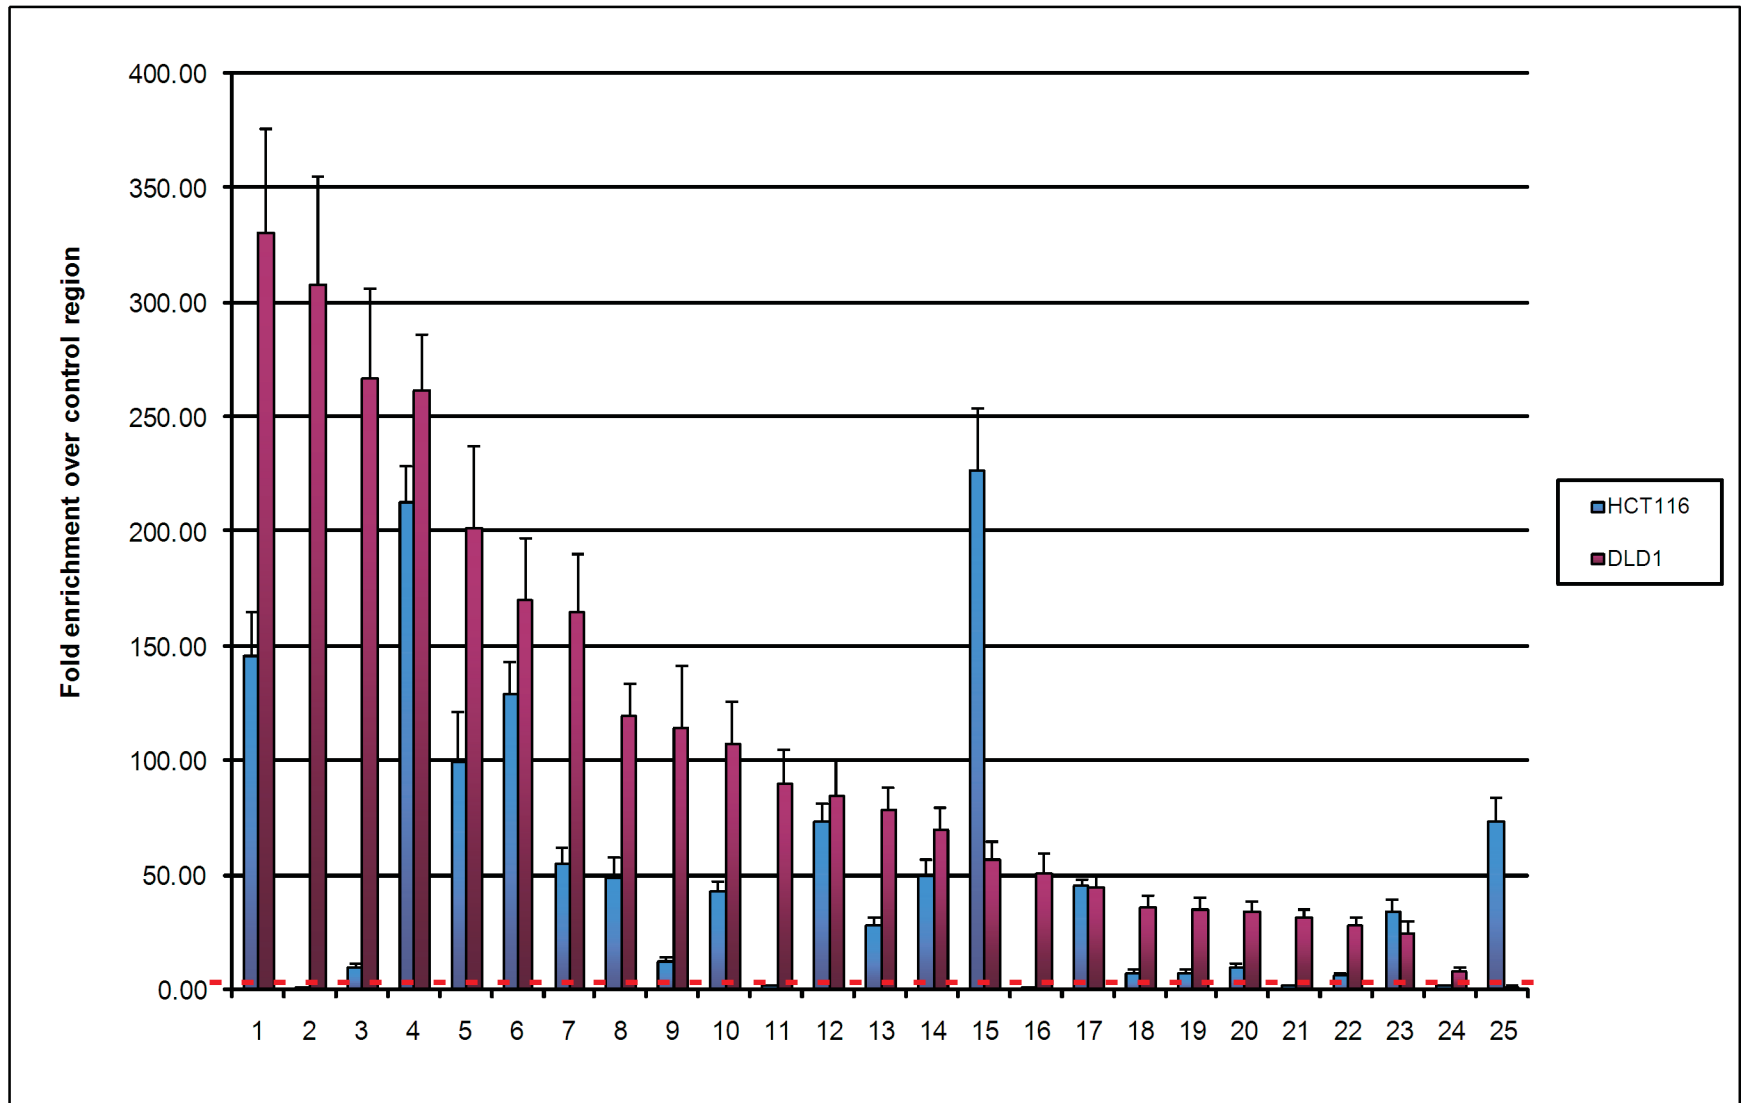

# Supplementary Figure 6

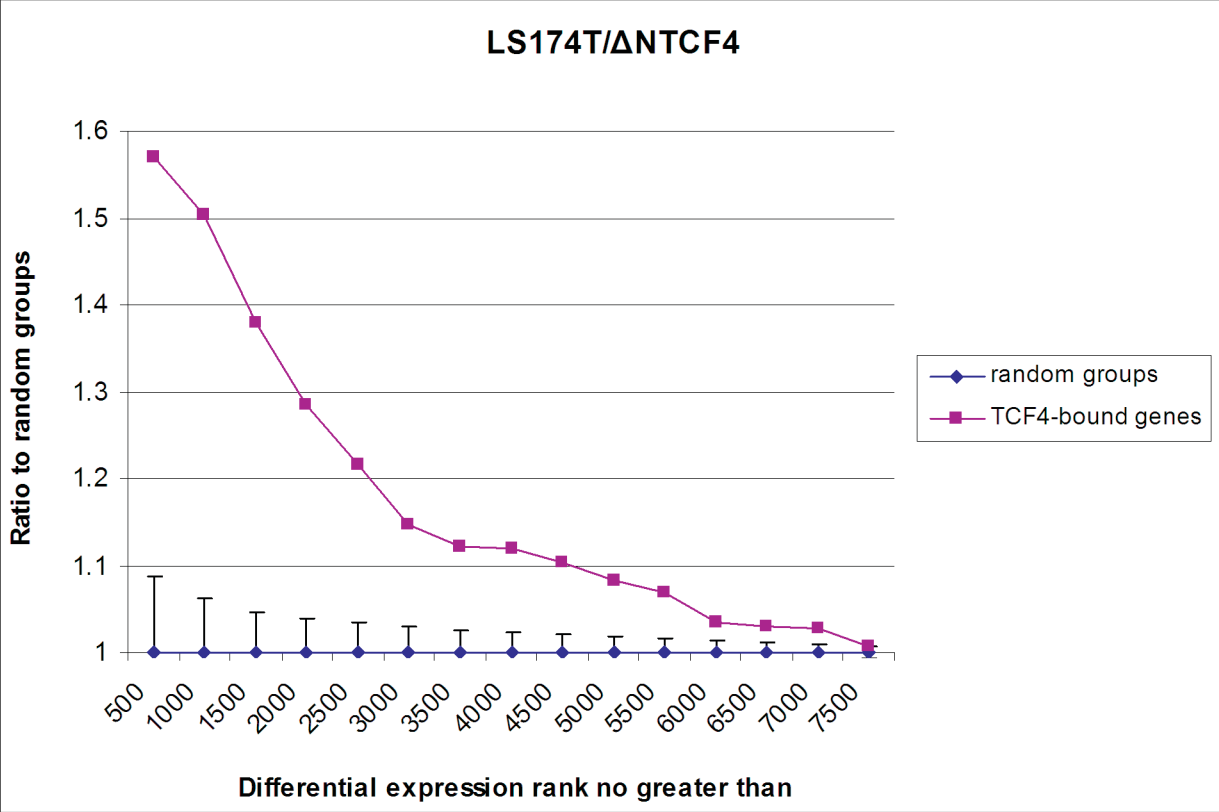

# Supplementary Figure 7

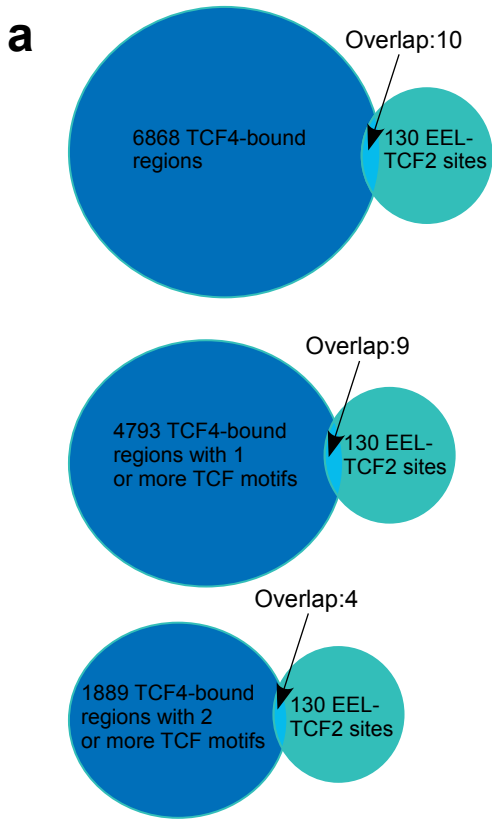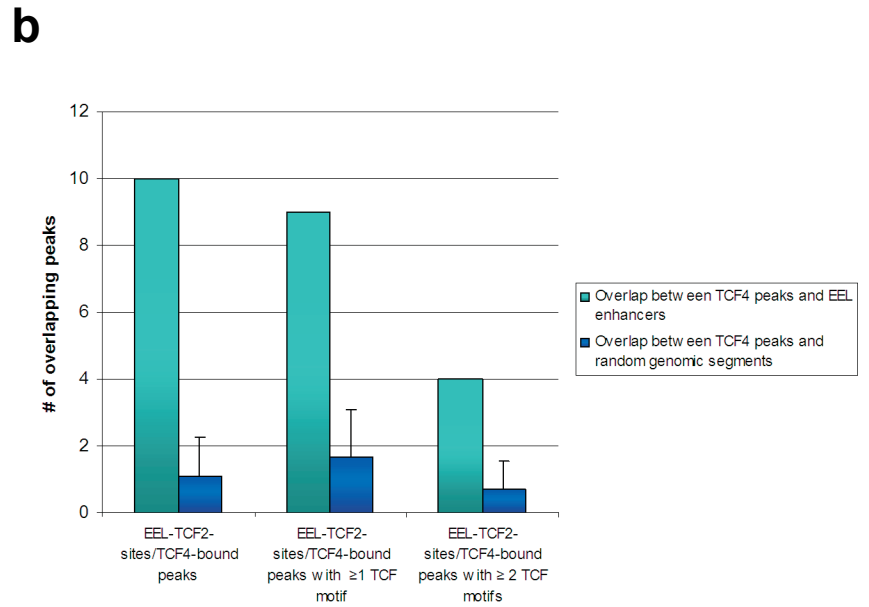

# Supplementary Figure 8

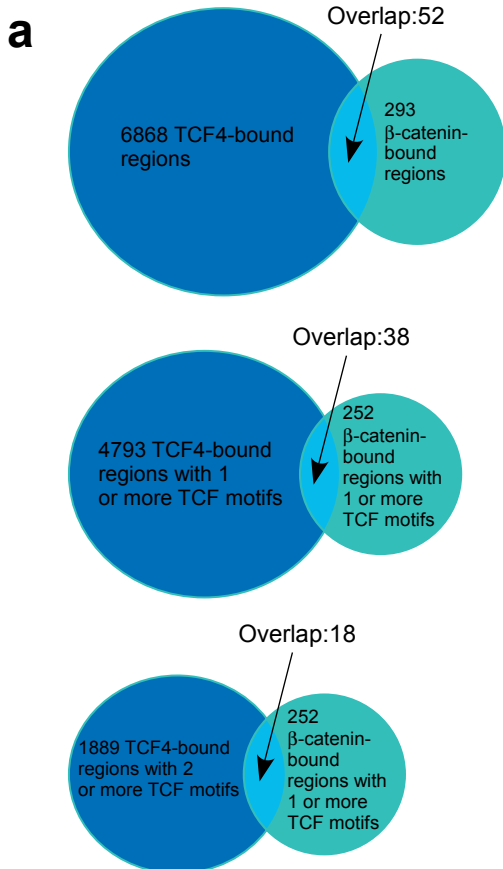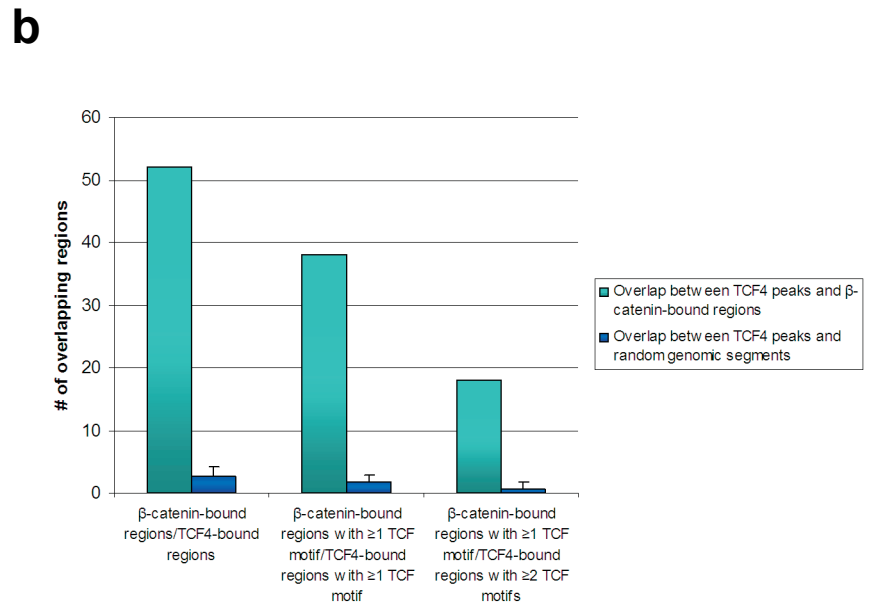

Supplement: molcellb_28_8_2732__1.pdf [file molcellb_28_8_2732__1.pdf]
